# Supplementary material for: Phase I–II study of lenalidomide and alemtuzumab in refractory chronic lymphocytic leukemia (CLL): effects on T cells and immune checkpoints
Source: Springer Nature journal article supplement (doi:10.1007/s00262-016-1922-6), 2016-11-04
Supplement: MOESM1 [file 11022354]

**Supplementary Figure 1.** Response duration, PFS and OS for patients treated with lenalidomide and alemtuzumab

a. Response duration

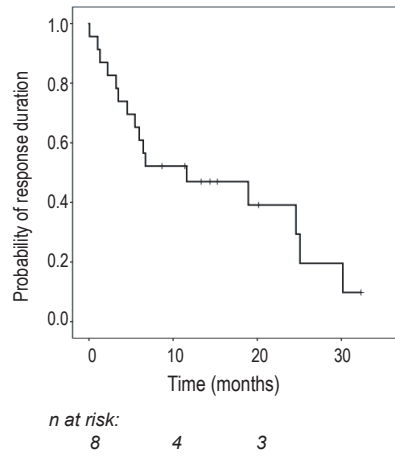

b. PFS

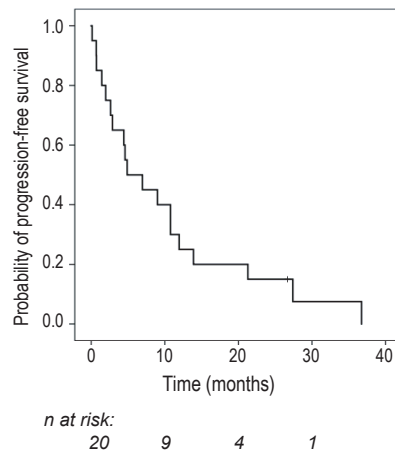

c. OS

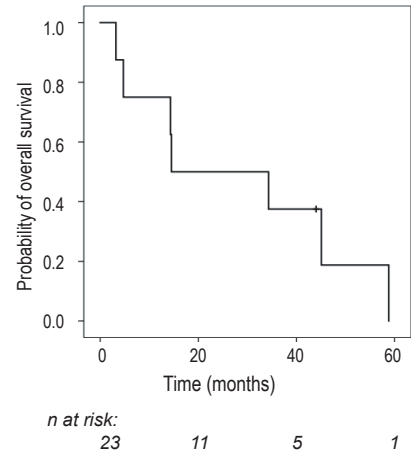

**Supplementary Table 1**

| Cell marker    | Fluorochrome                                 | Manufacturer                                                                          |
|----------------|----------------------------------------------|---------------------------------------------------------------------------------------|
| CD19           | PeCy7<br>APC-H7<br>Pacific Blue              | BD Biosciences, San Diego, CA, USA<br>BD Biosciences<br>BioLegend, San Diego, CA, USA |
| CD3            | PeCy7<br>APC<br>V450                         | BD Biosciences<br>BD Biosciences<br>PharMingen, San Diego, CA, USA                    |
| CD4            | PeCy7<br>APC-H7<br>FITC                      | BD Biosciences<br>BD Biosciences<br>eBioscience, San Diego, CA, USA                   |
| CD8            | PerCP<br>APC<br>Pacific Blue<br>V500 Horizon | BD Biosciences<br>BD Biosciences<br>PharMingen<br>BD Biosciences                      |
| CD16           | Pacific Blue                                 | PharMingen                                                                            |
| CD56           | Pe<br>PeCy7                                  | BD Biosciences<br>BD Biosciences                                                      |
| CD52           | FITC                                         | Caltag, Buckingham, UK                                                                |
| CD45RA         | Pacific Blue                                 | BioLegend                                                                             |
| CCR7           | Pe                                           | R&D Systems, Minneapolis, MN, USA                                                     |
| PD-1 (CD279)   | Pe                                           | BD Biosciences                                                                        |
| CTLA-4 (CD152) | Pe                                           | BD Biosciences                                                                        |
| PD-L1 (CD274)  | Pe                                           | BD Biosciences                                                                        |
| CCR6 (CD196)   | Pe                                           | BD Biosciences                                                                        |
| HLA-DR         | PerCP<br>APC-Cy7                             | BioLegend<br>BioLegend                                                                |
| CXCR3 (CD183)  | APC                                          | BD Biosciences                                                                        |
| CD25           | APC                                          | eBioscience                                                                           |
| FOXP3          | Pe                                           | eBioscience                                                                           |
| Ki67           | AF647                                        | BioLegend                                                                             |
| Perforin       | FITC                                         | BD Biosciences                                                                        |
| Granzyme B     | FITC                                         | BD Biosciences                                                                        |
